# Supplementary material for: Individual and synergetic charge transport properties at the solid and electrolyte interfaces of a single ultrathin single crystal of organic semiconductors
Source: Royal Society of Chemistry journal article supplement (doi:10.1039/d3cp00782k), 2023-01-01
Supplement: d3cp00782k1.pdf [file d3cp00782k1.pdf]

## Electronic Supplementary Information

for

### Individual and synergetic charge transport properties at the solid and electrolyte interfaces of a single ultrathin single crystal of organic semiconductors

Taehyun Won,<sup>a</sup> Shohei Kumagai,<sup>b\*</sup> Naotaka Kasuya,<sup>a,b\*</sup> Yu Yamashita,<sup>b,c</sup> Shun Watanabe,<sup>b</sup> Toshihiro Okamoto,<sup>a,b</sup> and Jun Takeya<sup>a,b,c\*</sup>

<sup>a</sup>*Department of Applied Chemistry, Graduate School of Engineering, The University of Tokyo, 7-3-1 Hongo, Bunkyo-ku, Tokyo 113-8656, Japan*

<sup>b</sup>*Material Innovation Research Center (MIRC) and Department of Advanced Materials Science, Graduate School of Frontier Sciences, The University of Tokyo, 5-1-5 Kashiwanoha, Kashiwa, Chiba 277-8561, Japan*

<sup>c</sup>*MANA, National Institute for Materials Science (NIMS), 1-1 Namiki, Tsukuba 205-0044, Japan*

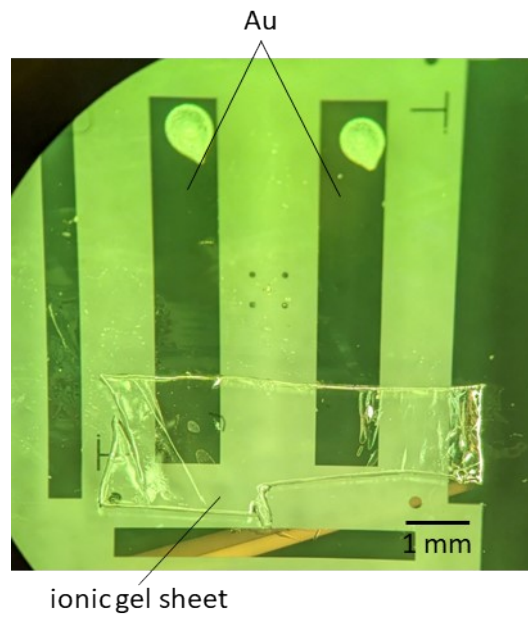

Fig. S1 Micrograph of the device of capacitance measurement for ionic gel.

## Estimation of contact resistance by four-probe method

Contact resistance measurements employ the four-probe transistor architecture as shown in Fig. 2d in the main text as well as in Fig. S2a below, according to the reported method.<sup>1</sup> The in-channel potential probes along the longitudinal direction were placed 50  $\mu\text{m}$  ( $x_1$ ) and 100  $\mu\text{m}$  ( $x_2$ ) from the source electrode, with  $V(x_1)$  and  $V(x_2)$  being the potentials at the respective voltage probes, while the distance between source and drain electrodes was 150  $\mu\text{m}$ . In the linear (Ohmic) regime, the potential profile from the source to the drain electrodes along the channel direction is approximated to be linear. Meanwhile, the voltage drops at respective electrodes ( $\Delta V_{C,S}$  and  $\Delta V_{C,D}$  for source and drain contacts, respectively) due to contact resistance.  $\Delta V_{C,S}$  and  $\Delta V_{C,D}$  are extracted by extrapolation of the potential profile to  $x = 0$  and  $L$  as shown in Fig. S2b. In our experiments,  $\Delta V_{C,S}$  and  $\Delta V_{C,D}$  were extracted at  $V_{BG} = -50$  V as shown in Fig. S2c, where the data at  $V_{SG} = -1.4$  and 2.0 V are shown as the representative. Because a drain current  $I_D$  is constant at source and drain contacts and within the channel due to charge conservation,  $R_S$  and  $R_D$  are calculated as  $\Delta V_{C,S}/I_D$  and  $\Delta V_{C,D}/I_D$ , respectively. Finally,  $R_S$  and  $R_D$  are normalized by channel width  $W$  to be  $R_S W$  and  $R_D W$  because the resistance is dependent on dimensions of a conductor.

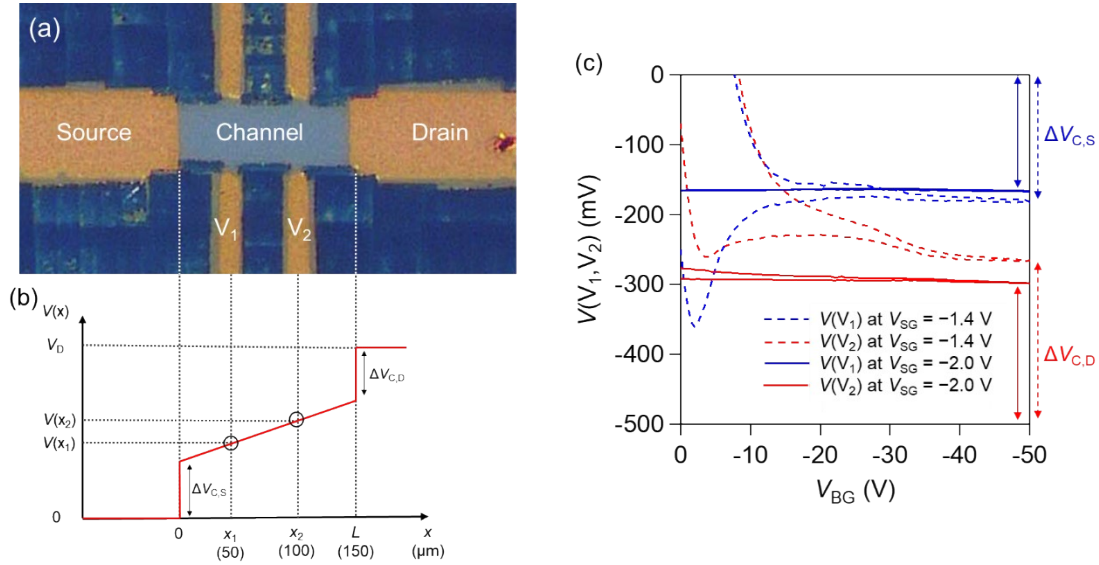

Fig. S2 (a) Optical microscopy image of a four-probe transistor architecture. (b) Schematic potential diagram. (c) Traces of in-channel potentials at probes  $V_1$  and  $V_2$  as a function of  $V_{BG}$  at  $V_{SG} = -1.4$  and 2.0 V.

## Supplementary References

- 1 A. Yamamura, S. Watanabe, M. Uno, M. Mitani, C. Mitsui, J. Tsurumi, N. Isahaya, Y. Kanaoka, T. Okamoto and J. Takeya, *Sci. Adv.*, 2018, **4**, eaao5758.
